## ION TRANSPORT AND ACID–BASE BALANCE IN FRESHWATER BIVALVES

ROGER A. BYRNE<sup>1,\*</sup> AND THOMAS H. DIETZ<sup>2</sup>

<sup>1</sup>Biology Department, State University of New York, College at Fredonia, New York 14063, USA and <sup>2</sup>Department of Zoology and Physiology, Louisiana State University, Baton Rouge, Louisiana 70803, USA

Accepted 23 October 1996

### Summary

Blood acid–base and ionic balance in freshwater bivalves is affected by the relative activities of epithelial Na<sup>+</sup> and Cl<sup>−</sup> transporters. In the unionid *Carunculina texasensis*, the Na<sup>+</sup>/H<sup>+</sup> exchanger is the predominant epithelial transporter that affects acid–base state, while Cl<sup>−</sup>/HCO<sub>3</sub><sup>−</sup> exchange is of lesser importance. In the corbiculid *Corbicula fluminea*, Cl<sup>−</sup> and Na<sup>+</sup> transport are both significant components affecting acid–base state. Serotonin (5-hydroxytryptamine, 5-HT) stimulates Na<sup>+</sup> and Cl<sup>−</sup> transport in both species. In *C. texasensis*, the effect of exogenous serotonin is four times greater on Na<sup>+</sup>/H<sup>+</sup> exchange than on Cl<sup>−</sup>/HCO<sub>3</sub><sup>−</sup> transport, resulting in an increase in acid secretion and a rise in blood pH. In a Na<sup>+</sup>-free environment, serotonin had no effect on blood acid–base state in *C. texasensis*. In *C. fluminea*, the acid–base consequences of serotonin stimulation of Na<sup>+</sup>/H<sup>+</sup>

exchange were offset by similar increases in Cl<sup>−</sup>/HCO<sub>3</sub><sup>−</sup> exchange and by alterations in blood P<sub>CO2</sub> in medium containing Na<sup>+</sup>. In Na<sup>+</sup>-free medium, stimulation of the Cl<sup>−</sup> transporter with 5-HT resulted in a decrease in blood pH. The differences between these two species are related to the reliance of *C. fluminea* on Cl<sup>−</sup> as the major anion in the blood, requiring high levels of epithelial Cl<sup>−</sup> transport. In *C. texasensis*, the anionic component of the blood consists of both Cl<sup>−</sup> and HCO<sub>3</sub><sup>−</sup> and these ions are interchangeable over a wide concentration range. Extracellular acid–base balance in freshwater bivalves is governed, in part, by epithelial ion transporters.

Key words: acid–base balance, serotonin, Cl<sup>−</sup> transport, HCO<sub>3</sub><sup>−</sup> transport, ion transport, bivalve, *Carunculina texasensis*, *Corbicula fluminea*.

### Introduction

Although freshwater bivalves are a polyphyletic group, they display striking convergence in some of their physiological adaptations to a dilute medium. In particular, the osmolality of their body fluids is remarkably low, ranging from 35 to 50 mosmol kg<sup>−1</sup> in *Dreissena polymorpha* (Dreissenidae) to 50–65 mosmol kg<sup>−1</sup> in *Corbicula fluminea* (Corbiculidae), and with values for members of the Unionidae averaging 40–50 mosmol kg<sup>−1</sup> (Potts, 1954; Dietz, 1979; Byrne *et al.* 1989; Horohov *et al.* 1992; Dietz *et al.* 1996). In general, Na<sup>+</sup> is the predominant cation, with HCO<sub>3</sub><sup>−</sup> and Cl<sup>−</sup> being the major anions. There are significant differences between freshwater bivalve groups: *Dreissena* and *Corbicula* have Cl<sup>−</sup> as their predominant anion, whereas the unionids typically employ Cl<sup>−</sup> and HCO<sub>3</sub><sup>−</sup> equally as major anions in their blood (Dietz, 1979; Horohov *et al.* 1992).

In order to maintain even these low levels of solute, freshwater bivalves must actively transport the major ions from the dilute medium. The gills are the site of both Na<sup>+</sup> (Dietz and Findley, 1980) and Cl<sup>−</sup> uptake (Dietz and Hagar, 1990). For the unionids and corbiculids, a Na<sup>+</sup>/H<sup>+</sup> exchanger and a Cl<sup>−</sup>/HCO<sub>3</sub><sup>−</sup> exchanger are the main transporters present, as shown by transport kinetic studies and the consequences of

application of specific inhibitors (Dietz, 1978; Dietz and Branton, 1979).

Na<sup>+</sup> transport is consistently stimulated in unionids and corbiculids by exogenous application of the neurotransmitter serotonin (5-hydroxytryptamine, 5-HT) in the bathing medium (Dietz *et al.* 1982; Zheng, 1996). Serotonin also stimulates Cl<sup>−</sup> transport in corbiculids (Zheng, 1996) and in *D. polymorpha* (Horohov *et al.* 1992).

The blood (more accurately the extracellular fluid) of freshwater and marine bivalve groups is very low in protein (Byrne and McMahon, 1991; Booth *et al.* 1984). Thus, the non-bicarbonate buffering capacity of the blood, which is usually directly related to the protein content, is also extremely low. Therefore, changes in the controlling components of acid–base balance, such as P<sub>CO2</sub>, and changes in the strong ion difference (SID) (Stewart, 1978) result in relatively large changes in blood pH (Byrne *et al.* 1991, 1995; Byrne and McMahon, 1991, 1994).

The interaction between ion transport and acid–base balance has been well studied in aquatic vertebrates, and particular attention has been given to mechanisms involving the gills of freshwater fish (Maetz *et al.* 1976; Perry *et al.* 1982; for a

\*e-mail: byrne@ait.fredonia.edu.

review, see McDonald *et al.* 1989). A combination of  $\text{Na}^+/\text{H}^+$ ;  $\text{Na}^+/\text{NH}_4^+$  and  $\text{Cl}^-/\text{HCO}_3^-$  exchange on the apical (bath side) surface of gill epithelia is largely responsible for gill-mediated ion exchange. This combination of cation and anion transport exchanges a strong ion for an acid or base equivalent. Thus, measurement of net movements of  $\text{Na}^+$  and  $\text{Cl}^-$  yields information on excretion or uptake of acid equivalents (McDonald *et al.* 1989).

In the present study, we examined the following questions. Can measurements of  $\text{Na}^+$  and  $\text{Cl}^-$  transport aid in the understanding of acid–base state in freshwater bivalves? Can neuromodulators that alter ion transport variables exert predictable effects on acid–base state? Are there differences in response or mechanism between phylogenetically distinct groups of freshwater bivalve, and does this information aid in the understanding of their physiology?

## Materials and methods

### Rationale

Experiments were designed to examine  $\text{Na}^+$  and  $\text{Cl}^-$  fluxes and blood acid–base variables of clams exposed to a pondwater medium and to compare these responses with those of animals incubated in medium deficient in either  $\text{Na}^+$  or  $\text{Cl}^-$ . Animals were also stimulated with the neuromodulator serotonin so that the acid–base effects of changes in epithelial ion transport would be more apparent.

### Animals

Specimens of the corbiculid *Corbicula fluminea* (Müller) were collected, under permit, either from Anococo Creek, 10 km northwest of Leesville, Louisiana, or from the Tangipahoa River at Percy Quin State Park, Mississippi. We collected the unionid *Carunculina texasensis* (Lea) from local ponds in the Baton Rouge area. Animals were returned to the laboratory and maintained unfed in artificial pondwater (APW, in  $\text{mmol l}^{-1}$ :  $\text{NaCl}$ , 0.5;  $\text{NaHCO}_3$ , 0.2;  $\text{KCl}$ , 0.05;  $\text{CaCl}_2$ , 0.4; Dietz and Branton, 1975) at ambient temperature (22–24 °C) for at least a week prior to use.

### Treatments

We measured blood acid–base variables and ion composition in bivalves following incubation in a series of ion-restricted media, with or without the addition of serotonin. In addition, we measured the components of ion flux (net flux, influx and efflux) in these bathing media and in the presence or absence of 5-HT.

### Blood ion and acid–base status experiments

Animals ( $N=5-17$  per treatment category) were incubated in individual containers (volume 50 ml) for 3 h at 23 °C in one of the following media: artificial pondwater  $\pm 0.1 \text{ mmol l}^{-1}$  serotonin;  $1 \text{ mmol l}^{-1}$  choline chloride ( $\text{Na}^+$ -free medium)  $\pm 0.1 \text{ mmol l}^{-1}$  serotonin;  $0.5 \text{ mmol l}^{-1}$   $\text{Na}_2\text{SO}_4$  ( $\text{Cl}^-$ -free medium)  $\pm 0.1 \text{ mmol l}^{-1}$  serotonin. At the end of the incubation period, each animal was removed and a blood sample was

taken by pericardiac puncture (Fyhn and Costlow, 1975). The pH of the sample was measured immediately using a micro pH electrode (Microelectrodes Inc., MI-730) fitted to a thermostatted blood-gas cell (Cameron Instruments) maintained at 23 °C by a recirculating refrigerated water bath. The electrode was connected to a blood-gas analyzer (Cameron Instruments). Blood total  $\text{CO}_2$  ( $C_{\text{CO}_2}$ ) was measured immediately by gas chromatography using the methods described in Horohov *et al.* (1992). Briefly, 50  $\mu\text{l}$  of blood was introduced into a 10 ml gas-tight syringe containing 2.0 ml of  $\text{N}_2$  ( $\text{CO}_2$ -free)-equilibrated  $0.10 \text{ mol l}^{-1}$   $\text{HCl}$  and a 3.0 ml gas space filled with  $\text{N}_2$ . The syringe contents were sealed and the contents mixed on a shaker for 5 min to allow equilibration of the gas space with  $\text{CO}_2$  liberated from the sample. The gas space from the syringe was injected through a drier (magnesium perchlorate) into the input port of a Hach gas chromatograph (80 mesh Porapak column). The resulting  $\text{CO}_2$  peak was compared with peaks for bicarbonate standards, and blood  $C_{\text{CO}_2}$  was expressed as  $\text{mmol l}^{-1}$ . Blood  $P_{\text{CO}_2}$  ( $\text{mmHg}$ ;  $1 \text{ mmHg}=133.3 \text{ Pa}$ ) and apparent  $\text{HCO}_3^-$  concentration ( $[\text{HCO}_3^-]_{\text{app}}$ ,  $\text{mmol l}^{-1}$ ; *sensu* Heisler, 1986) were calculated by rearrangement of the Henderson–Hasselbalch equation:

$$\text{pH} = \text{pK}_{\text{app}} + \log[(C_{\text{CO}_2} - \alpha_{\text{CO}_2} P_{\text{CO}_2}) / \alpha_{\text{CO}_2} P_{\text{CO}_2}], \quad (1)$$

where  $\text{pK}_{\text{app}}$  (apparent pK) at 23 °C for freshwater bivalve blood is 6.324 (Byrne *et al.* 1991) and  $\alpha_{\text{CO}_2}$  is the solubility of  $\text{CO}_2$  in a salt solution similar to clam blood at the experimental temperature ( $0.046 \text{ mmol l}^{-1} \text{ mmHg}^{-1}$ , see Cameron, 1986). Apparent bicarbonate concentration  $[\text{HCO}_3^-]_{\text{app}}$  was calculated as:

$$[\text{HCO}_3^-]_{\text{app}} = C_{\text{CO}_2} - \alpha_{\text{CO}_2} P_{\text{CO}_2}. \quad (2)$$

The remaining blood sample was centrifuged for 3 min at 9000 *g* to remove particulate matter and stored at 4 °C for later ion analyses. Blood  $[\text{Na}^+]$  was determined by flame photometry on diluted samples and blood  $[\text{Cl}^-]$  was measured by electrometric titration.

The non-bicarbonate buffer value ( $\beta_{\text{NB}}$ ) for freshwater bivalve blood at 23 °C was taken from Byrne *et al.* (1991) as  $0.99 \mu\text{mol pH unit}^{-1} \text{ g}^{-1}$  (slykes). Base excess ( $\text{mmol l}^{-1}$ ) was calculated as:

$$\text{base excess} = [\text{HCO}_3^-]_{\text{app,pw}} - [\text{HCO}_3^-]_{\text{app,exp}} - \beta_{\text{NB}}(\text{pH}_{\text{pw}} - \text{pH}_{\text{exp}}), \quad (3)$$

where the subscripts 'pw' and 'exp' refer to values for pondwater control animals and experimental animals, respectively (Booth *et al.* 1984).

### Ion flux experiments

Specimens of *Corbicula fluminea* and *Carunculina texasensis* ( $N=5-10$  per treatment category) were incubated for 3 h in 50 ml of one of the following eight media: artificial pondwater containing  $6 \times 10^3 - 14 \times 10^3 \text{ cts min}^{-1} \text{ ml}^{-1}$   $^{22}\text{Na}$  or  $^{36}\text{Cl} \pm 0.1 \text{ mmol l}^{-1}$  serotonin;  $1 \text{ mmol l}^{-1}$  choline chloride ( $\text{Na}^+$ -free medium) +  $^{36}\text{Cl} \pm 0.1 \text{ mmol l}^{-1}$  serotonin;  $0.5 \text{ mmol l}^{-1}$   $\text{Na}_2\text{SO}_4$  ( $\text{Cl}^-$ -free medium) +  $^{22}\text{Na} \pm 0.1 \text{ mmol l}^{-1}$  serotonin. Bath samples (5.0 ml) were taken at time zero and

after the 3 h incubation. Animals were removed, and the soft tissues were dried (90 °C; 24 h) and weighed. The radioactivity of bath samples was measured on 0.5 ml subsamples using liquid scintillation methods (Weigman *et al.* 1975). Bathing medium  $[\text{Na}^+]$  was measured by flame photometry and  $[\text{Cl}^-]$  by electrometric titration. Net ion flux was determined from the change in  $[\text{Na}^+]$  or  $[\text{Cl}^-]$  in the bathing medium and was expressed as  $\mu\text{mol g}^{-1}$  dry mass  $\text{h}^{-1}$ . Ion influx ( $J_i$ ) was determined by the loss of isotope from the bathing medium using standard methods (Graves and Dietz, 1982), and ion efflux ( $J_o$ ) was calculated as the algebraic difference between influx and net flux ( $J_{\text{net}}$ ).

#### Statistical analyses

All data are expressed as means  $\pm$  S.E.M.; significance was accepted at  $P < 0.05$ . Overall differences between means were determined by single-factor analysis of variance (ANOVA) followed by Fisher's protected least significant difference (PLSD) to determine differences between specific means. Data from individual species were analyzed separately. Analyses were performed following Statview (Abacus Systems) procedures.

### Results

The acid–base responses of both species to serotonin treatment and treatment with ion-restrictive media are summarized in a pH– $\text{HCO}_3^-$  (Davenport) diagram (Fig. 1). The blood of pondwater-acclimated *Corbicula fluminea* is characterized as having a relatively low pH of approximately 7.9 and a low  $\text{HCO}_3^-$  concentration, whereas the blood of pondwater-acclimated *Carunculina texasensis*, in common with that of most other unionid species, has a higher pH and a higher bicarbonate content (Fig. 1).

#### *Corbicula fluminea* blood acid–base variables and ion composition

Application of exogenous serotonin to pondwater-acclimated *Corbicula fluminea* had no effect on blood acid–base variables or ion composition (Table 1; Fig. 1). However, animals incubated in  $\text{Cl}^-$ -free medium developed a significant base excess demonstrated by an increase in blood  $[\text{HCO}_3^-]$  with no significant change in blood pH or  $P_{\text{CO}_2}$  (Table 1; Fig. 1). Application of serotonin to these animals resulted in a further increase in base excess, this time with a concomitant increase in  $P_{\text{CO}_2}$ , but with no change in blood pH (Table 1; Fig. 1). Serotonin stimulation of clams bathed in  $\text{Cl}^-$ -free medium did not affect blood  $[\text{Na}^+]$ , but blood  $\text{Cl}^-$  levels did decline significantly compared with values for animals bathed in  $\text{Na}^+$ -free medium (Table 1). When specimens of *C. fluminea* were incubated in a  $\text{Na}^+$ -free medium, a base deficit occurred relative to pondwater-acclimated controls, as  $\text{HCO}_3^-$  content fell, but with non-significant changes in  $P_{\text{CO}_2}$  or in blood pH (Table 1; Fig. 1).

Treatment of these animals with serotonin resulted in a significant decrease in blood pH with no further change in

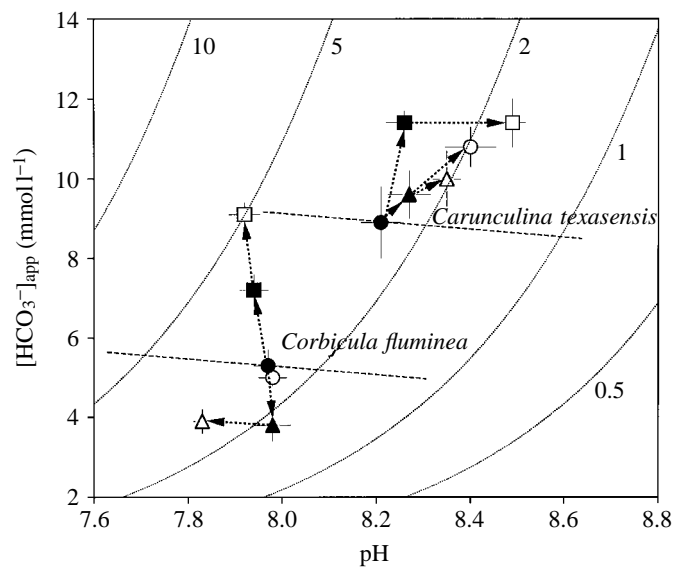

Fig. 1. A pH–bicarbonate (Davenport) diagram illustrating the effects of incubation of the corbiculid *Corbicula fluminea* and the unionid *Carunculina texasensis* in pondwater (circles),  $\text{Cl}^-$ -free medium ( $0.5 \text{ mmol l}^{-1}$  sodium sulfate) (squares) and  $\text{Na}^+$ -free medium ( $1 \text{ mmol l}^{-1}$  choline chloride) (triangles) at 23 °C. Filled symbols are for animals incubated for 3 h in the respective medium, open symbols represent values for animals incubated in the respective medium with the addition of  $0.1 \text{ mmol l}^{-1}$  serotonin. The  $x$  and  $y$  error bars are standard errors of the mean ( $N=5-17$ ). The dashed straight line represents the non-bicarbonate buffer line for freshwater bivalve blood at 23 °C (from Byrne *et al.* 1991) and was fitted through the values for pondwater-acclimated individuals for both species. The isopleths are for  $P_{\text{CO}_2}$  values in equilibrium with clam blood; values are in mmHg ( $1 \text{ mmHg}=133.3 \text{ Pa}$ ).

$[\text{HCO}_3^-]$ , but with a 25% increase in mean blood  $P_{\text{CO}_2}$  that was not statistically significant (Table 1; Fig. 1). Blood  $\text{Cl}^-$  levels increased to  $30 \text{ mmol l}^{-1}$ , whereas blood  $\text{Na}^+$  levels were lower than those of pondwater-bathed animals.

#### *Carunculina texasensis* blood acid–base variables and ion composition

The effects of serotonin and the compounding effects of the ion-restricted medium are more apparent on blood acid–base variables and ion composition in the unionid *Carunculina texasensis* (Table 2; Fig. 1). Blood pH and  $\text{HCO}_3^-$  levels for pondwater-acclimated *C. texasensis* are elevated significantly over those of *C. fluminea* (Fig. 1). Blood pH was significantly elevated in pondwater-acclimated *C. texasensis* when stimulated with serotonin (Table 2; Fig. 1). There was a significant serotonin-induced base excess, with blood  $\text{HCO}_3^-$  content increasing and a significant reduction in blood  $P_{\text{CO}_2}$ , resulting in a combined respiratory and non-respiratory alkalosis (Table 2; Fig. 1). Although blood  $[\text{Na}^+]$  was unaltered, blood  $\text{Cl}^-$  levels were significantly reduced following serotonin treatment, and there was an equivalent increase in  $[\text{HCO}_3^-]$  (Table 2). Incubation in  $\text{Cl}^-$ -free medium resulted in an elevation in base excess compared with that of

Table 1. Effects of 3 h incubation in artificial pondwater in ion-restricted media ( $\text{Cl}^-$ -free,  $0.5 \text{ mmol l}^{-1}$  sodium sulfate;  $\text{Na}^+$ -free,  $1 \text{ mmol l}^{-1}$  choline chloride) with and without  $0.1 \text{ mmol l}^{-1}$  serotonin on blood acid-base variables and ion composition in *Corbicula fluminea*

|                                                          | Pondwater control            | Pondwater +5-HT             | $\text{Cl}^-$ -free control | $\text{Cl}^-$ -free +5-HT  | $\text{Na}^+$ -free control | $\text{Na}^+$ -free +5-HT  |
|----------------------------------------------------------|------------------------------|-----------------------------|-----------------------------|----------------------------|-----------------------------|----------------------------|
| pH                                                       | $7.974 \pm 0.030^b$<br>(17)  | $7.975 \pm 0.038^b$<br>(17) | $7.944 \pm 0.030^b$<br>(5)  | $7.924 \pm 0.033^b$<br>(7) | $7.979 \pm 0.038^b$<br>(6)  | $7.833 \pm 0.018^a$<br>(8) |
| $\text{CCO}_2$ ( $\text{mmol l}^{-1}$ )                  | $5.4 \pm 0.4^b$<br>(17)      | $5.2 \pm 0.3^b$<br>(15)     | $7.4 \pm 0.4^c$<br>(5)      | $9.3 \pm 0.3^d$<br>(7)     | $3.9 \pm 0.4^a$<br>(6)      | $4.0 \pm 0.3^a$<br>(8)     |
| $\text{PCO}_2$ (mmHg)                                    | $2.7 \pm 0.3^{a,b}$<br>(17)  | $2.8 \pm 0.4^{a,b}$<br>(15) | $3.8 \pm 0.3^{b,c}$<br>(5)  | $5.0 \pm 0.3^c$<br>(7)     | $1.9 \pm 0.4^a$<br>(6)      | $2.6 \pm 0.1^{a,b}$<br>(8) |
| $[\text{HCO}_3^-]_{\text{app}}$ ( $\text{mmol l}^{-1}$ ) | $5.3 \pm 0.4^b$<br>(17)      | $5.0 \pm 0.2^b$<br>(15)     | $7.2 \pm 0.4^c$<br>(5)      | $9.1 \pm 0.3^d$<br>(7)     | $3.8 \pm 0.4^a$<br>(6)      | $3.9 \pm 0.3^a$<br>(8)     |
| $[\text{Na}^+]$ ( $\text{mmol l}^{-1}$ )                 | $31.8 \pm 0.5^b$<br>(17)     | $30.9 \pm 0.5^b$<br>(15)    | $28.1 \pm 1.4^a$<br>(5)     | $28.9 \pm 0.5^a$<br>(7)    | $28.6 \pm 0.8^a$<br>(6)     | $27.1 \pm 0.9^a$<br>(8)    |
| $[\text{Cl}^-]$ ( $\text{mmol l}^{-1}$ )                 | $27.8 \pm 0.9^{a,b}$<br>(17) | $26.5 \pm 0.7^a$<br>(15)    | $28.5 \pm 1.3^{a,b}$<br>(5) | $25.7 \pm 0.6^a$<br>(7)    | $30.0 \pm 0.7^b$<br>(6)     | $30.0 \pm 0.8^b$<br>(8)    |

Data are expressed as means  $\pm$  S.E.M. (N).

Means within a row with different letters are significantly different from one another ( $P < 0.05$ ; Fisher PLSD after ANOVA).

5-HT, serotonin.

1 mmHg = 133.3 Pa.

pondwater-incubated controls similar to that noted with *C. fluminea*. There was no change in blood pH,  $[\text{Na}^+]$  or  $[\text{Cl}^-]$ , but  $\text{PCO}_2$  increased (Table 2; Fig. 1). When stimulated with serotonin, there was a significant alkalosis in these animals due entirely to a reduction in blood  $\text{PCO}_2$  with no change in  $[\text{HCO}_3^-]$  (Table 2; Fig. 1). Blood  $[\text{Na}^+]$  remained at pondwater-acclimated levels but blood  $[\text{Cl}^-]$  declined significantly (Table 2). In the absence of external  $\text{Na}^+$ , blood pH was not significantly altered compared with that of pondwater-incubated controls; none of the other variables

measured was altered (Table 2). Application of serotonin to animals incubated in a  $\text{Na}^+$ -free medium resulted in no significant change in blood pH compared with  $\text{Na}^+$ -free controls, but blood pH was significantly elevated over that of pondwater-acclimated animals (Table 2; Fig. 1).

#### $\text{Na}^+$ fluxes

Serotonin stimulated  $\text{Na}^+$  influx in both *C. fluminea* and *C. texasensis* (Table 3). In pondwater, both species were essentially in steady state with regard to  $\text{Na}^+$ , having net fluxes

Table 2. Effects of 3 h incubation in artificial pondwater in ion-restricted media ( $\text{Cl}^-$ -free,  $0.5 \text{ mmol l}^{-1}$  sodium sulfate;  $\text{Na}^+$ -free,  $1 \text{ mmol l}^{-1}$  choline chloride) with and without  $0.1 \text{ mmol l}^{-1}$  serotonin on blood acid-base variables and ion composition in *Carunculina texasensis*

|                                                          | Pondwater control           | Pondwater +5-HT              | $\text{Cl}^-$ -free control    | $\text{Cl}^-$ -free +5-HT  | $\text{Na}^+$ -free control    | $\text{Na}^+$ -free +5-HT      |
|----------------------------------------------------------|-----------------------------|------------------------------|--------------------------------|----------------------------|--------------------------------|--------------------------------|
| pH                                                       | $8.205 \pm 0.042^a$<br>(11) | $8.401 \pm 0.054^c$<br>(10)  | $8.267 \pm 0.039^{a,b}$<br>(6) | $8.493 \pm 0.027^c$<br>(6) | $8.271 \pm 0.045^{a,b}$<br>(6) | $8.347 \pm 0.030^{b,c}$<br>(6) |
| $\text{CCO}_2$ ( $\text{mmol l}^{-1}$ )                  | $9.0 \pm 0.4^a$<br>(15)     | $10.3 \pm 0.4^{b,c}$<br>(14) | $11.5 \pm 0.3^c$<br>(6)        | $11.5 \pm 0.6^c$<br>(6)    | $9.7 \pm 0.6^{a,b}$<br>(6)     | $10.1 \pm 0.7^{a,b,c}$<br>(6)  |
| $\text{PCO}_2$ (mmHg)                                    | $2.2 \pm 0.2^{b,c}$<br>(6)  | $1.5 \pm 0.2^a$<br>(6)       | $2.9 \pm 0.3^d$<br>(6)         | $1.7 \pm 0.1^{a,b}$<br>(6) | $2.4 \pm 0.3^{c,d}$<br>(6)     | $2.0 \pm 0.2^{a,b,c}$<br>(6)   |
| $[\text{HCO}_3^-]_{\text{app}}$ ( $\text{mmol l}^{-1}$ ) | $8.9 \pm 0.9^a$<br>(17)     | $10.8 \pm 0.5^b$<br>(6)      | $11.4 \pm 0.3^b$<br>(6)        | $11.4 \pm 0.6^b$<br>(6)    | $9.6 \pm 0.6^a$<br>(6)         | $10.0 \pm 0.7^{a,b}$<br>(6)    |
| $[\text{Na}^+]$ ( $\text{mmol l}^{-1}$ )                 | $18.0 \pm 0.5^a$<br>(15)    | $17.2 \pm 0.4^a$<br>(14)     | $17.3 \pm 1.0^a$<br>(6)        | $16.7 \pm 0.5^a$<br>(6)    | $17.8 \pm 0.6^a$<br>(6)        | $17.0 \pm 0.5^a$<br>(6)        |
| $[\text{Cl}^-]$ ( $\text{mmol l}^{-1}$ )                 | $13.0 \pm 0.2^c$<br>(17)    | $11.2 \pm 0.3^b$<br>(14)     | $12.2 \pm 0.8^c$<br>(6)        | $10.1 \pm 0.3^a$<br>(6)    | $13.1 \pm 0.6^c$<br>(6)        | $12.2 \pm 0.4^c$<br>(6)        |

Data are expressed as means  $\pm$  S.E.M. (N).

Means within a row with different letters are significantly different from one another ( $P < 0.05$ ; Fisher PLSD after ANOVA).

5-HT, serotonin.

1 mmHg = 133.3 Pa.

Table 3. Effects of external serotonin stimulation ( $0.1 \text{ mmol l}^{-1}$ ) on the components of the whole-animal  $\text{Na}^+$  flux in specimens of *Corbicula fluminea* and *Carunculina texasensis* incubated in artificial pondwater and in  $\text{Cl}^-$ -free medium ( $0.5 \text{ mmol l}^{-1}$  sodium sulfate)

|                               | $\text{Na}^+$ flux ( $\mu\text{mol g}^{-1} \text{ h}^{-1}$ ) |                             |                            |
|-------------------------------|--------------------------------------------------------------|-----------------------------|----------------------------|
|                               | $J_{\text{net}}$                                             | $J_{\text{i}}$              | $J_{\text{o}}$             |
| <i>Corbicula fluminea</i>     |                                                              |                             |                            |
| Pondwater                     | $-0.08 \pm 0.55^{\text{a}}$                                  | $4.05 \pm 1.05^{\text{a}}$  | $4.12 \pm 0.86^{\text{a}}$ |
| Pondwater + 5-HT              | $4.14 \pm 0.58^{\text{b}}$                                   | $9.05 \pm 1.17^{\text{b}}$  | $4.91 \pm 0.73^{\text{a}}$ |
| $\text{Cl}^-$ -free           | $-1.32 \pm 0.62^{\text{a}}$                                  | $3.15 \pm 0.43^{\text{a}}$  | $4.47 \pm 0.50^{\text{a}}$ |
| $\text{Cl}^-$ -free + 5-HT    | $5.72 \pm 1.16^{\text{b}}$                                   | $13.53 \pm 1.94^{\text{c}}$ | $7.81 \pm 1.86^{\text{b}}$ |
| <i>Carunculina texasensis</i> |                                                              |                             |                            |
| Pondwater                     | $-0.19 \pm 0.16^{\text{a}}$                                  | $1.19 \pm 0.22^{\text{a}}$  | $1.38 \pm 0.15^{\text{a}}$ |
| Pondwater + 5-HT              | $2.77 \pm 0.21^{\text{b}}$                                   | $5.02 \pm 0.51^{\text{b}}$  | $2.25 \pm 0.46^{\text{a}}$ |
| $\text{Cl}^-$ -free           | $-0.65 \pm 0.16^{\text{a}}$                                  | $0.70 \pm 0.14^{\text{a}}$  | $1.35 \pm 0.26^{\text{a}}$ |
| $\text{Cl}^-$ -free + 5-HT    | $3.04 \pm 0.39^{\text{b}}$                                   | $4.67 \pm 0.62^{\text{b}}$  | $1.64 \pm 0.30^{\text{a}}$ |

Values are means  $\pm$  S.E.M.;  $N=9$  for each *C. fluminea* treatment and  $N=10$  for each *C. texasensis* treatment.

For each species, means within a column with different letters are significantly different from one another ( $P < 0.05$ ; Fisher's PLSD after ANOVA).

5-HT, serotonin.

$J_{\text{net}}$ , net flux;  $J_{\text{i}}$ , influx;  $J_{\text{o}}$ , efflux.

of approximately zero. There were no differences between fluxes ( $J_{\text{net}}$ ,  $J_{\text{i}}$  and  $J_{\text{o}}$ ) in control animals in pondwater and in  $\text{Cl}^-$ -free medium. Serotonin stimulated  $\text{Na}^+$  influx by more than twofold for *C. fluminea* and by approximately fivefold for *C. texasensis* when bathed in pondwater (Table 3). Efflux was not affected by either bathing medium or serotonin stimulation in *C. texasensis*. Pondwater-bathed *C. fluminea* displayed no alteration in efflux in response to serotonin stimulation. However, when *C. fluminea* were stimulated with serotonin in a  $\text{Cl}^-$ -free medium,  $\text{Na}^+$  efflux and  $\text{Na}^+$  influx increased. Examination of fluxes of individual animals demonstrated that those with high influxes also had the highest effluxes (data not shown), suggesting high turnover rates in these individuals.

#### $\text{Cl}^-$ fluxes

Specimens of *C. fluminea* utilized as controls in this study were experiencing net  $\text{Cl}^-$  losses both in pondwater and in  $\text{Na}^+$ -free bathing medium, whereas *C. texasensis* were in approximate steady state (Table 4). In both species, serotonin stimulation resulted in an increase in  $\text{Cl}^-$  influx in both bathing media. In *C. fluminea*, there was an approximate doubling of the influx, resulting in positive net  $\text{Cl}^-$  fluxes, while efflux was not significantly altered. There was no effect of  $\text{Na}^+$  absence on any of the fluxes in *C. fluminea* (Table 4). In *C. texasensis*, serotonin stimulated  $\text{Cl}^-$  influx to a similar extent in both pondwater and  $\text{Na}^+$ -free medium (Table 4). Unlike *C. fluminea*, incubation of *C. texasensis* in  $\text{Na}^+$ -free medium resulted in a reduction in  $\text{Cl}^-$  efflux to approximately half the rate observed in pondwater-incubated controls. The effluxes were not further affected by serotonin application.

Table 4. Effects of external serotonin stimulation ( $0.1 \text{ mmol l}^{-1}$ ) on the components of the whole-animal  $\text{Cl}^-$  flux in specimens of *Corbicula fluminea* and *Carunculina texasensis* incubated in artificial pondwater and in  $\text{Na}^+$ -free medium ( $1 \text{ mmol l}^{-1}$  choline chloride)

|                               | $\text{Cl}^-$ flux ( $\mu\text{mol g}^{-1} \text{ h}^{-1}$ ) |                            |                              |
|-------------------------------|--------------------------------------------------------------|----------------------------|------------------------------|
|                               | $J_{\text{net}}$                                             | $J_{\text{i}}$             | $J_{\text{o}}$               |
| <i>Corbicula fluminea</i>     |                                                              |                            |                              |
| Pondwater                     | $-1.31 \pm 0.43^{\text{a}}$                                  | $2.15 \pm 0.26^{\text{a}}$ | $3.46 \pm 0.58^{\text{a}}$   |
| Pondwater + 5-HT              | $2.27 \pm 0.93^{\text{b}}$                                   | $5.66 \pm 0.77^{\text{b}}$ | $3.38 \pm 0.67^{\text{a}}$   |
| $\text{Na}^+$ -free           | $-1.80 \pm 0.39^{\text{a}}$                                  | $2.97 \pm 0.40^{\text{a}}$ | $4.77 \pm 0.52^{\text{a}}$   |
| $\text{Na}^+$ -free + 5-HT    | $1.21 \pm 0.67^{\text{b}}$                                   | $5.88 \pm 0.91^{\text{b}}$ | $4.66 \pm 0.74^{\text{a}}$   |
| <i>Carunculina texasensis</i> |                                                              |                            |                              |
| Pondwater                     | $-0.36 \pm 0.16^{\text{a}}$                                  | $1.28 \pm 0.37^{\text{a}}$ | $1.65 \pm 0.42^{\text{b,c}}$ |
| Pondwater + 5-HT              | $0.62 \pm 0.33^{\text{b}}$                                   | $2.35 \pm 0.24^{\text{b}}$ | $1.73 \pm 0.39^{\text{c}}$   |
| $\text{Na}^+$ -free           | $0.17 \pm 0.13^{\text{a}}$                                   | $0.92 \pm 0.10^{\text{a}}$ | $0.75 \pm 0.42^{\text{a}}$   |
| $\text{Na}^+$ -free + 5-HT    | $1.12 \pm 0.15^{\text{b}}$                                   | $1.93 \pm 0.17^{\text{b}}$ | $0.81 \pm 0.12^{\text{a,b}}$ |

Values are means  $\pm$  S.E.M.;  $N=9$  for each *C. fluminea* treatment and  $N=10$  for each *C. texasensis* treatment.

For each species, means within a column with different letters are significantly different from one another ( $P < 0.5$ ; Fisher's PLSD after ANOVA).

5-HT, serotonin.

$J_{\text{net}}$ , net flux;  $J_{\text{i}}$ , influx;  $J_{\text{o}}$ , efflux.

#### Interactions between ion transport and acid–base/ionic status

Summary diagrams for both *C. fluminea* (Fig. 2) and *C. texasensis* (Fig. 3) highlight changes in components of acid flux and blood acid–base balance. The net acid flux can be expressed as the algebraic difference between the net flux of  $\text{Cl}^-$  and the net flux of  $\text{Na}^+$  (McDonald *et al.* 1989). Pondwater-acclimated *C. fluminea* were in net acid loss because  $\text{Cl}^-$  net flux was lower than  $\text{Na}^+$  net flux (Fig. 2). Serotonin stimulation did not alter blood pH or the net loss of acid equivalents, despite net increases in  $\text{Na}^+$  and  $\text{Cl}^-$  flux (Fig. 2). In pondwater,  $\text{Na}^+$  influx is approximately twice  $\text{Cl}^-$  influx in *C. fluminea*, and serotonin stimulation doubles the influx of both  $\text{Na}^+$  and  $\text{Cl}^-$ , thereby maintaining the relative stoichiometry (Tables 3, 4). The elevated ion fluxes could result in an increase in acid secretion with consequent changes in blood variables. However, the relative difference between the net  $\text{Na}^+$  and  $\text{Cl}^-$  fluxes was maintained upon serotonin stimulation, resulting in no net change in acid secretion (Fig. 2).

The responses of these species to ion-deficient media accentuate the significance of the differences both in ion-transporting properties and in the ionic composition of the blood. In the absence of external  $\text{Cl}^-$ , there were offsetting increases in base excess and  $P_{\text{CO}_2}$  in *C. fluminea* (Fig. 2). Stimulation by serotonin resulted in a large increase in  $\text{Na}^+$  net flux and caused an equally large increase in net acid equivalent loss. Blood pH was not altered, despite further increases in base excess, because of a compensatory increase in  $P_{\text{CO}_2}$ . In  $\text{Na}^+$ -free controls, there was no net movement of acid

Fig. 2. Effects of incubation in pondwater,  $\text{Cl}^-$ -free medium ( $0.5 \text{ mmol l}^{-1}$  sodium sulfate) and  $\text{Na}^+$ -free medium ( $1 \text{ mmol l}^{-1}$  choline chloride) with or without  $0.1 \text{ mmol l}^{-1}$  serotonin (5-HT) on variables affecting acid-base status in *Corbicula fluminea*. The value over the bar in each treatment block is blood pH. Net  $\text{Cl}^-$  flux ( $J_{\text{net}}^{\text{Cl}}$ ) minus net  $\text{Na}^+$  flux ( $J_{\text{net}}^{\text{Na}}$ ) represents net  $\text{H}^+$  flux ( $J_{\text{net}}^{\text{H}}$ ) (after McDonald *et al.* 1989). Error bars are standard errors of the mean ( $N=5-17$ ). APW, artificial pondwater.

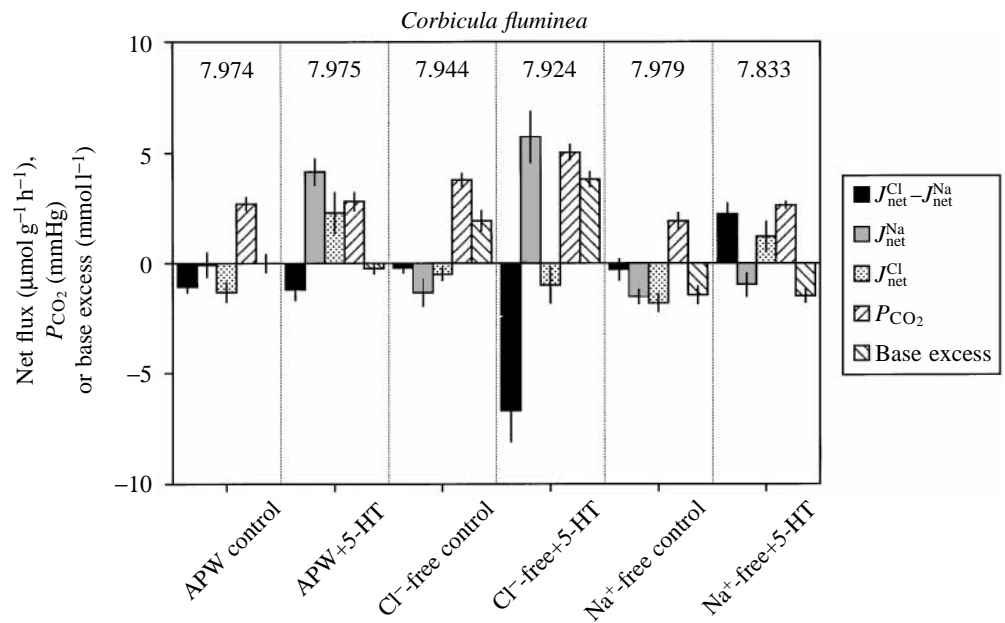

equivalents because  $\text{Na}^+$  and  $\text{Cl}^-$  net fluxes were similar (Fig. 2). Base excess was negative (=base deficit), but  $P_{\text{CO}_2}$  was lower than in pondwater-acclimated animals, resulting in no significant change in blood pH. Serotonin stimulated  $\text{Cl}^-$  transport and, as net  $\text{Na}^+$  flux was unaltered in the absence of exogenous  $\text{Na}^+$ , net acid flux was positive (the animals retained protons). The base deficit was not changed, but  $P_{\text{CO}_2}$  increased, causing a significant decline in blood pH (Fig. 2).

*Carunculina texasensis* was in a steady state in pondwater with acid flux at around zero (Fig. 3). There was a significant net loss of acid equivalents when these animals were stimulated with serotonin, with a concurrent increase in base excess and a decline in blood  $P_{\text{CO}_2}$  combining to cause a rise in blood pH (Fig. 3). In a  $\text{Cl}^-$ -free medium, there was a slightly

positive net acid flux (proton retention), but a large base excess was offset by an increase in blood  $P_{\text{CO}_2}$ . Serotonin stimulation significantly increased net  $\text{Na}^+$  flux in this medium, resulting in a loss of acid equivalents, base excess was not altered significantly and blood  $P_{\text{CO}_2}$  declined, the end result being an increase in blood pH. Stimulation of  $\text{Cl}^-$  flux in *C. texasensis* in a  $\text{Na}^+$ -free medium did not result in a significant change in acid uptake (proton retention); base excess was not affected, nor was blood  $P_{\text{CO}_2}$ , resulting in no significant change in blood pH (Fig. 3). Thus, in *C. texasensis*, serotonin affects  $\text{Na}^+$  influx to a significantly greater extent than it affects  $\text{Cl}^-$  influx. Consequently, the differences in net  $\text{Na}^+$  and  $\text{Cl}^-$  flux have a significantly greater effect on acid secretion than that observed in *C. fluminea*.

Fig. 3. Effects of incubation in pondwater,  $\text{Cl}^-$ -free medium ( $0.5 \text{ mmol l}^{-1}$  sodium sulfate) and  $\text{Na}^+$ -free medium ( $1 \text{ mmol l}^{-1}$  choline chloride) with or without  $0.1 \text{ mmol l}^{-1}$  serotonin (5-HT) on variables affecting acid-base status in *Carunculina texasensis*. The value over the bar in each treatment block is blood pH. Net  $\text{Cl}^-$  flux ( $J_{\text{net}}^{\text{Cl}}$ ) minus net  $\text{Na}^+$  flux ( $J_{\text{net}}^{\text{Na}}$ ) represents net  $\text{H}^+$  flux ( $J_{\text{net}}^{\text{H}}$ ) (after McDonald *et al.* 1989). Error bars are standard errors of the mean ( $N=5-17$ ). APW, artificial pondwater.

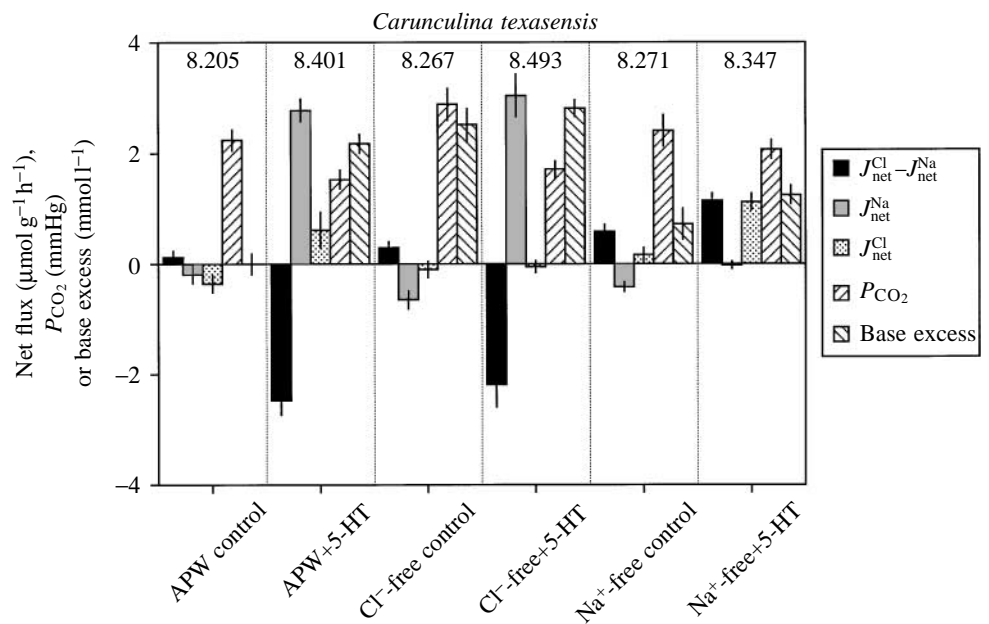

### Discussion

The interrelationships between  $\text{Na}^+/\text{Cl}^-$  transport and acid–base balance in these two species of freshwater bivalve are dependent on the relative activities of the transporters and the overall blood ion composition of each species. *Corbicula fluminea*, in common with other freshwater bivalve species with relatively short histories in fresh water (Keen and Casey, 1969), has a blood composition relying on  $\text{Cl}^-$  as the major anion (Dietz, 1979). Consequently, rates of  $\text{Cl}^-$  transport in *C. fluminea* are high and are apparently under neural control as shown by serotonin stimulation of  $\text{Cl}^-$  transport in this species (this study; Zheng, 1996). In contrast, *Carunculina texasensis* conforms to the unionid model of having approximately equal amounts of  $\text{Cl}^-$  and  $\text{HCO}_3^-$  in the blood (Dietz, 1979). In the present study, we report the first instance of effective stimulation of  $\text{Cl}^-$  influx by exogenously applied serotonin in a unionid species, but the level of stimulation is significantly lower than that of  $\text{Na}^+$  stimulation and lower than that observed in *C. fluminea*.

The disturbances in blood acid–base state in these species both in ion-deficient media and in response to serotonin stimulation are consistent with the actions of largely independent  $\text{Na}^+/\text{H}^+$  and  $\text{Cl}^-/\text{HCO}_3^-$  exchangers in the gill epithelia. Blood pH in *C. texasensis* was alterable to a greater extent than that of *C. fluminea*. The change in pH was primarily due to the greater activity of the  $\text{Na}^+/\text{H}^+$  exchanger relative to the  $\text{Cl}^-/\text{HCO}_3^-$  exchanger in *C. texasensis* so that, under conditions of serotonin stimulation, acid secretion increased. Also, a higher blood pH is subject to greater perturbations by addition/deletion of acid equivalents than a lower blood pH, given similar buffering environments. This is a consequence of measuring pH on a logarithmic scale. Although the  $\text{HCO}_3^-$  buffering capacity increases with increasing  $\text{HCO}_3^-$  content, changes in  $P_{\text{CO}_2}$  have a greater influence at higher pH. In both species, incubation in a  $\text{Cl}^-$ -free medium resulted in retention of  $\text{HCO}_3^-$  in the blood as a result of a reduced ability to exchange  $\text{HCO}_3^-$  with the environment and continued  $\text{Na}^+/\text{H}^+$  exchange, with  $\text{H}^+$  excretion being equivalent to  $\text{HCO}_3^-$  retention.

For the unionid, maintenance of ionic homeostasis requires greater reliance on active  $\text{Na}^+$  uptake than on uptake of  $\text{Cl}^-$ . The anionic component of blood consists of a combination of  $\text{Cl}^-$  and  $\text{HCO}_3^-$ , with substitution of one for the other over a substantial concentration range (Scheide and Dietz, 1982). As  $\text{HCO}_3^-$  can be mobilized or removed relatively easily by metabolic and respiratory means, the requirement for a tightly regulated  $\text{Cl}^-$  transport system, controlled by hormonal and/or neural means, is much less important. In contrast, *C. fluminea* must regulate  $\text{Cl}^-$  uptake in order to maintain blood  $\text{Cl}^-$  at a high and relatively constant level. Although blood  $\text{HCO}_3^-$  levels increase and decrease in response to treatment, *C. fluminea* has a much less well-developed capacity to substitute  $\text{Cl}^-$  and  $\text{HCO}_3^-$  in the blood.

It is uncertain whether bivalve molluscs actively regulate blood pH. Acid–base responses to changes in environmental gases result in predictable and large changes in blood pH in the unionids *Elliptio complanata* (Byrne *et al.* 1995) and

*Anodonta grandis simpsoniana* (Byrne and McMahon, 1990). Although some compensatory mechanisms to alleviate perturbations in blood pH have been described for these species, the acid–base responses are generally regulated only within wide limits. Booth *et al.* (1984) concluded that the marine bivalve *Mytilus edulis* had a limited ability to regulate blood pH and that maintenance of blood pH within narrow limits may be unnecessary. This view was supported by a related study (Walsh *et al.* 1984) in which it was demonstrated that intracellular pH was not strictly dependent on extracellular pH in this species. The gas-carrying characteristics of respiratory pigments are functionally dependent on blood pH; thus, the absence of such pigments from the blood of most marine and all freshwater bivalve species would remove a major reason for maintenance of close extracellular pH regulation (Booth *et al.* 1984).

However, shell-forming animals, such as bivalve molluscs, must maintain an overall acid–base balance because the deposition of shell ( $\text{CaCO}_3$ ) is accompanied by the release of acid equivalents (Wilbur, 1983). Therefore, if a bivalve is growing a shell, it must excrete protons in order to remove the accumulated proton load due to carbonate deposition. The time course of this pH regulation may encompass longer periods than are generally utilized in laboratory experiments. Indeed, shell deposition normally occurs in a distinctly discontinuous manner as shown by the presence of growth lines. Zheng (1996) demonstrated that *C. fluminea* maintains a constant ratio of  $\text{Na}^+$  and  $\text{Cl}^-$  net flux, the result of which is a constant rate of acid secretion over a wide range of  $\text{Na}^+$  and  $\text{Cl}^-$  net fluxes, suggesting that, over time, acid excretion is maintained as a function of the regulation of specific ions.

Thus, control of blood acid–base balance in the long term may have more to do with regulating shell deposition/reabsorption and of maintaining  $\text{Ca}^{2+}$  and  $\text{HCO}_3^-$  levels than with maintaining short-term extracellular homeostasis. Shell formation is influenced by environmental factors such as hypoxia (Wilbur, 1983) and pH (Machado *et al.* 1988). Calcium stores in unionid bivalve species are defended during environmental hypoxia by sequestration of blood  $\text{Ca}^{2+}$  released from the shell into calcium phosphate concretions located extracellularly in the gills (Silverman *et al.* 1983). These studies suggest that perturbations in blood acid–base balance and the associated changes in calcium dynamics affect the process of shell formation occurring in the separate extrapallial compartment. Coimbra *et al.* (1993) postulate that the dynamics of shell deposition are ultimately under the control of  $[\text{Ca}^{2+}]$  in the blood and of the transepithelial electrical potential difference across the outer mantle epithelium. These factors exert a controlling effect on the direction of  $\text{Ca}^{2+}$  movement into or out of the extrapallial compartment (Coimbra *et al.* 1993). This is well illustrated when bivalves are exposed to air, which results in a respiratory acidosis because the pathway for metabolic  $\text{CO}_2$  exchange with the environment is severely compromised. When *C. fluminea* is exposed to air,  $\text{Ca}^{2+}$  and  $\text{HCO}_3^-$  are mobilized from the shell and appear in the blood (Byrne *et al.* 1991). The respiratory

acidosis causes alterations in the  $\text{Ca}^{2+}$  and  $\text{HCO}_3^-$  dynamics between the blood/extrapallial compartments, resulting in shell reabsorption. The effect on blood acid–base balance is to partially alleviate the acidosis by providing a large base excess of  $\text{HCO}_3^-$  (Byrne *et al.* 1991). In addition, blood  $P_{\text{CO}_2}$  could rise to high levels without resulting in severe acidosis; this provides a sufficient gradient for gas loss to the environment, thereby achieving a steady-state acid–base balance (Byrne *et al.* 1991; Byrne and McMahon, 1994). The blood acid–base responses to emersion were similar in the unionid *Anodonta grandis simpsoniana* (Byrne and McMahon, 1991), suggesting that broadly similar processes were occurring in both species and that the importance of the regulation of blood acid–base balance is to provide a suitable environment to control the deposition and reabsorption of shell calcium.

The two species of freshwater bivalve utilized in this study represent lineages with sharply different histories in fresh water. Unionids have inhabited fresh water since the Cambrian, whereas corbiculids invaded fresh water in the relatively recent geological past (Triassic) (Keen and Casey, 1969). Other bivalve groups with a recent history in fresh water are some members of the Dreissenidae, represented in North America by *Dreissena polymorpha*. *D. polymorpha* conforms to the model that recent invaders of fresh water retain  $\text{Cl}^-$  as the major anion and have a relatively lower level of  $\text{HCO}_3^-$  in the blood (Horohov *et al.* 1992). This species also possesses  $\text{Na}^+$  and  $\text{Cl}^-$  transporters capable of high rates of transport; both these transporters are stimulated by serotonin (Horohov *et al.* 1992).

Pondwater-acclimated bivalves having a greater reliance on  $\text{Cl}^-$  as the major anion have a comparatively lower blood pH. Blood with a low level of  $\text{HCO}_3^-$  may be the more archetypal condition for bivalves coming into fresh water, a position supported by the low levels of  $\text{HCO}_3^-$  found in the blood of marine bivalve species and in *D. polymorpha* (Booth *et al.* 1984; Horohov *et al.* 1992). The significance to those unionids that shift to a blood with higher  $[\text{HCO}_3^-]$  is open to speculation. It is possible that, because all ions tend to be at low concentration in fresh water, reducing the dependence on one of these ions ( $\text{Cl}^-$ ) and replacing it with an ion that can be endogenously produced from metabolism ( $\text{HCO}_3^-$ ) would be an adaptive strategy. The relationship between blood acid–base balance and the dynamics of shell formation seems to be one of shifting equilibria so that a change in blood pH brought on by retaining  $\text{HCO}_3^-$  would need only to require a compensatory shift in the ionic components of the extrapallial fluid compartment in order to achieve a new equilibrium. The maintenance of freshwater bivalve blood pH and acid–base balance may be important to this interrelationship.

This research was supported, in part, by an NSF Research Opportunity Award supplementing NSF grant DCB90-17461.

### References

BOOTH, C. E., McDONALD, D. G. AND WALSH, P. J. (1984). Acid–base balance in the sea mussel, *Mytilus edulis*. I. Effects of hypoxia and

- air-exposure on hemolymph acid–base status. *Mar. Biol. Lett.* **5**, 347–358.
- BYRNE, R. A., BURLESON, M. L., SMATRESK, N. J. AND MCMAHON, R. F. (1995). Respiratory and acid–base consequences of zebra mussel infestation on the valves of unionids. *Can. J. Zool.* **73**, 1489–1494.
- BYRNE, R. A. AND MCMAHON, B. R. (1990). Acid–base and ion regulatory responses to environmental  $\text{O}_2$  and  $\text{CO}_2$  in a freshwater bivalve. *Am. Zool.* **62**, 385.
- BYRNE, R. A. AND MCMAHON, B. R. (1991). Acid–base and ionic regulation, during and following emersion, in the freshwater bivalve, *Anodonta grandis simpsoniana* (Bivalvia: Unionidae). *Biol. Bull. mar. Biol. Lab., Woods Hole* **181**, 289–297.
- BYRNE, R. A. AND MCMAHON, R. F. (1994). Behavioral and physiological responses to emersion in freshwater bivalves. *Am. Zool.* **34**, 194–204.
- BYRNE, R. A., MCMAHON, R. F. AND DIETZ, T. H. (1989). The effects of aerial exposure and subsequent reimmersion on hemolymph osmolality, ion composition and ion flux in the freshwater bivalve, *Corbicula fluminea*. *Physiol. Zool.* **62**, 1187–1202.
- BYRNE, R. A., SHIPMAN, B. N., SMATRESK., N. J., DIETZ, T. H. AND MCMAHON, R. F. (1991). Acid–base balance during prolonged emergence in the freshwater bivalve, *Corbicula fluminea*. *Physiol. Zool.* **64**, 748–766.
- CAMERON, J. N. (1986). *Principles of Physiological Measurement*. Orlando, FL: Academic Press.
- COIMBRA, A. M., FERREIRA, K. G., FERNANDES, P. AND FERREIRA, H. G. (1993). Calcium changes in *Anodonta cygnea*: barriers and driving gradients. *J. comp. Physiol. B* **163**, 196–202.
- DIETZ, T. H. (1978). Sodium transport in the freshwater mussel *Carunculina texasensis* (Lea). *Am. J. Physiol.* **235**, R35–R40.
- DIETZ, T. H. (1979). Uptake of sodium and chloride by freshwater mussels. *Can. J. Zool.* **57**, 156–160.
- DIETZ, T. H. AND BRANTON, W. D. (1979). Active chloride transport in freshwater mussels. *Physiol. Zool.* **52**, 520–528.
- DIETZ, T. H. AND FINDLEY, A. M. (1980). Ion-stimulated ATPase activity and NaCl uptake in the gills of freshwater mussels. *Can. J. Zool.* **58**, 917–923.
- DIETZ, T. H. AND HAGAR, A. F. (1990). Chloride uptake in isolated gills of the freshwater mussel, *Ligumia subrostrata*. *Can. J. Zool.* **68**, 6–9.
- DIETZ, T. H., SCHEIDE, J. I. AND SAINTSING, D. G. (1982). Monoamine transmitters and cyclic AMP stimulation of Na transport in freshwater mussels. *Can. J. Zool.* **60**, 1408–1411.
- DIETZ, T. H., WILCOX, S. J., BYRNE, R. A., LYNN, J. W. AND SILVERMAN, H. (1996). Osmotic and ionic regulation of North American zebra mussels (*Dreissena polymorpha*). *Am. Zool.* **36**, 364–372.
- FYHN, H.-J. AND COSTLOW, J. D. (1975). Anaerobic sampling of body fluids in bivalve molluscs. *Comp. Biochem. Physiol.* **52A**, 266–268.
- GRAVES, S. Y. AND DIETZ, T. H. (1982). Cyclic AMP stimulation and prostaglandin inhibition of Na transport in freshwater mussels. *Comp. Biochem. Physiol.* **71A**, 65–70.
- HEISLER, N. (1986). Buffering and transmembrane ion transfer processes. In *Acid–Base Regulation in Animals* (ed. N. Heisler), pp. 3–47. Amsterdam: Elsevier.
- HOROHOV, J., SILVERMAN, H., LYNN, J. W. AND DIETZ, T. H. (1992). Ion transport in the freshwater zebra mussel, *Dreissena polymorpha*. *Biol. Bull. mar. Biol. Lab., Woods Hole* **183**, 297–303.



- KEEN, A. M. AND CASEY, R. (1969). Family Corbiculidae, Gray, 1847. In *Treatise on Invertebrate Paleontology. Pt. N.* (ed. N. R. C. Moore), pp. 665–669. Boulder, CO: Geological Society of America.
- MACHADO, J., COIMBRA, J., SA, C. AND CARDOSO, I. (1988). Shell thickening in *Anodonta cygnea* by induced acidosis. *Comp. Biochem. Physiol.* **91A**, 645–651.
- MAETZ, J., PAYAN, P. AND DE RENZIS, G. (1976). Controversial aspects of ionic uptake in fresh-water animals. In *Perspectives in Experimental Biology*, vol. 1, *Zoology* (ed. P. Spencer-Davis), pp. 77–92. New York: Plenum Press.
- MCDONALD, D. G., TANG, Y. AND BOUTILIER, R. G. (1989). Acid and ion transfer across the gills of fish: mechanisms and regulation. *Can. J. Zool.* **67**, 3046–3054.
- PERRY, S. F., DAVIE, P. S., DAXBOECK, C. AND RANDALL, D. J. (1982). A comparison of CO<sub>2</sub> excretion in a spontaneously ventilating blood-perfused trout preparation and saline-perfused gill preparations: contribution of the branchial epithelium and red blood cell. *J. exp. Biol.* **101**, 47–60.
- POTTS, W. T. W. (1954). The inorganic composition of the blood of *Mytilus edulis* and *Anodonta cygnea*. *J. exp. Biol.* **31**, 376–385.
- SCHEIDE, J. I. AND DIETZ, T. H. (1982). The effects of independent sodium and chloride depletion on ion balance in freshwater mussels. *Can. J. Zool.* **60**, 1676–1682.
- SCHEIDE, J. I. AND DIETZ, T. H. (1986). Serotonin regulation of gill cAMP production, Na transport and water uptake in freshwater mussels. *J. exp. Zool.* **240**, 309–314.
- SILVERMAN, H., STEFFENS, W. I. AND DIETZ, T. H. (1983). Calcium concretions in the gills of a freshwater mussel serve as a calcium reservoir during periods of hypoxia. *J. exp. Zool.* **227**, 177–189.
- STEWART, P. D. (1978). Independent and dependent variables of acid–base control. *Respir. Physiol.* **33**, 9–26.
- WALSH, P. J., MCDONALD, D. G. AND BOOTH, C. E. (1984). Acid–base balance in the sea mussel, *Mytilus edulis*. II. Effects of hypoxia and air-exposure on intracellular acid–base status. *Mar. Biol. Lett.* **5**, 359–369.
- WEIGMAN, T., WOLDRING, M. G. AND PRATT, J. J. (1975). A new cocktail for liquid scintillation counting of aqueous radioimmunoassay-samples. *Clin. chim. Acta* **59**, 347–356.
- WILBUR, K. M. (1983). Shell formation. In *The Mollusca*, vol. IV (ed. K. M. Wilbur and A. S. M. Saleudin), pp. 235–287. New York: Academic Press.
- ZHENG, H. (1996). Ion transport in the freshwater bivalve, *Corbicula fluminea* (Müller). PhD dissertation, Louisiana State University.
